# Supplementary material for: Genetic and chemotherapeutic influences on germline hypermutation
Source: PubMed Central journal article supplement (PMC9117138; doi:10.1038/s41586-022-04712-2), 2022-05-11
Supplement: 41586_2022_4712_MOESM1_ESM.pdf [file 41586_2022_4712_MOESM1_ESM.pdf]

**Supplementary information**

---

**Genetic and chemotherapeutic influences  
on germline hypermutation**

---

In the format provided by the  
authors and unedited

## Supplementary Note

### The Genomics England Research Consortium

Ambrose, J. C.<sup>1</sup> ; Arumugam, P.<sup>1</sup> ; Bevers, R.<sup>1</sup> ; Bleda, M.<sup>1</sup> ; Boardman-Pretty, F.<sup>1,2</sup> ; Boustred, C. R.<sup>1</sup> ; Brittain, H.<sup>1</sup> ; Caulfield, M. J.<sup>1,2</sup> ; Chan, G. C.<sup>1</sup> ; Fowler, T.<sup>1</sup> ; Giess A.<sup>1</sup> ; Hamblin, A.<sup>1</sup> ; Henderson, S.<sup>1,2</sup> ; Hubbard, T. J. P.<sup>1</sup> ; Jackson, R.<sup>1</sup> ; Jones, L. J.<sup>1,2</sup> ; Kasperaviciute, D.<sup>1,2</sup> ; Kayikci, M.<sup>1</sup> ; Kousathanas, A.<sup>1</sup> ; Lahnstein, L.<sup>1</sup> ; Leigh, S. E. A.<sup>1</sup> ; Leong, I. U. S.<sup>1</sup> ; Lopez, F. J.<sup>1</sup> ; Maleady-Crowe, F.<sup>1</sup> ; McEntagart, M.<sup>1</sup> ; Minnici F.<sup>1</sup> ; Moutsianas, L.<sup>1,2</sup> ; Mueller, M.<sup>1,2</sup> ; Murugaesu, N.<sup>1</sup> ; Need, A. C.<sup>1,2</sup> ; O'Donovan P.<sup>1</sup> ; Odhams, C. A.<sup>1</sup> ; Patch, C.<sup>1,2</sup> ; Perez-Gil, D.<sup>1</sup> ; Pereira, M. B.<sup>1</sup> ; Pullinger, J.<sup>1</sup> ; Rahim, T.<sup>1</sup> ; Rendon, A.<sup>1</sup> ; Rogers, T.<sup>1</sup> ; Savage, K.<sup>1</sup> ; Sawant, K.<sup>1</sup> ; Scott, R. H.<sup>1</sup> ; Siddiq, A.<sup>1</sup> ; Sieghart, A.<sup>1</sup> ; Smith, S. C.<sup>1</sup> ; Sosinsky, A.<sup>1,2</sup> ; Stuckey, A.<sup>1</sup> ; Tanguy M.<sup>1</sup> ; Taylor Tavares, A. L.<sup>1</sup> ; Thomas, E. R. A.<sup>1,2</sup> ; Thompson, S. R.<sup>1</sup> ; Tucci, A.<sup>1,2</sup> ; Welland, M. J.<sup>1</sup> ; Williams, E.<sup>1</sup> ; Witkowska, K.<sup>1,2</sup> ; Wood, S. M.<sup>1,2</sup>.

1. Genomics England, London, UK

2. William Harvey Research Institute, Queen Mary University of London, London, EC1M 6BQ, UK.

## Supplemental Figures

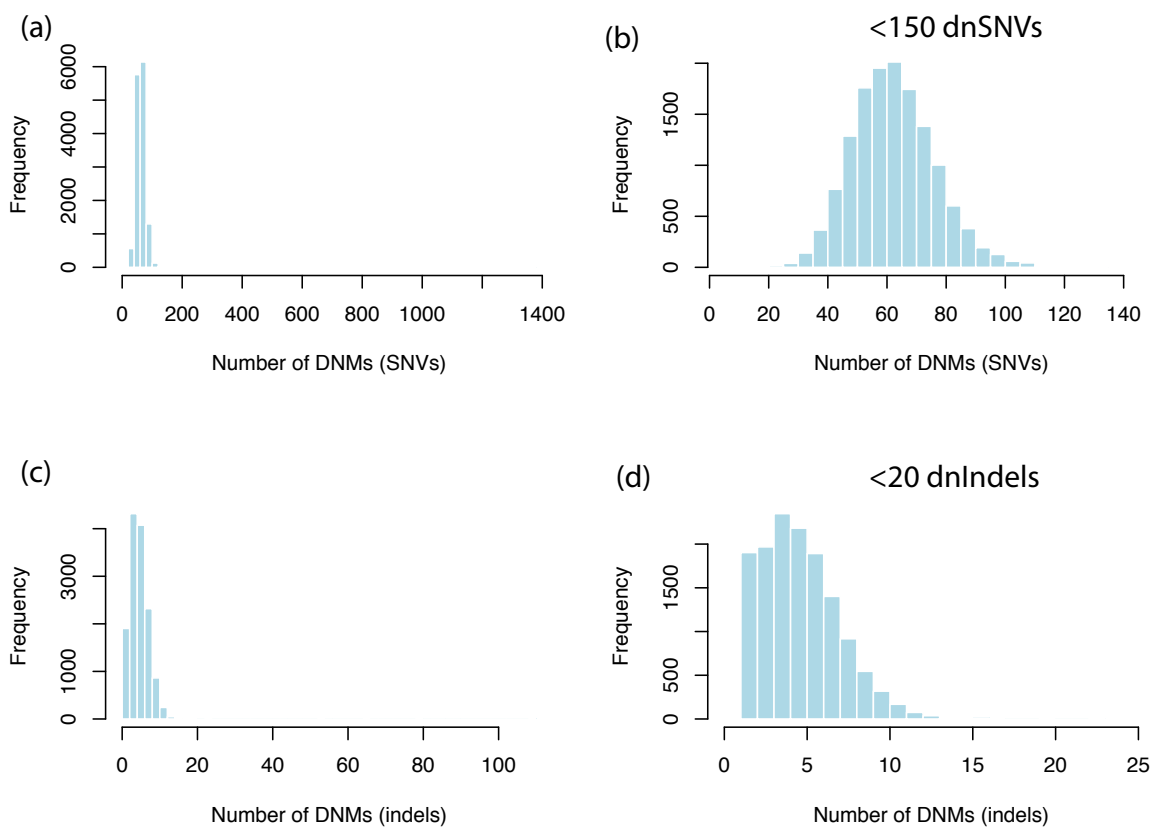

**Supplemental Figure 1:** Distribution of number of *de novo* SNVs for all individuals (a) and those with <150 DNMs (b). Distribution of number of *de novo* InDels per person for all individuals (c) and those with <20 indels (d).

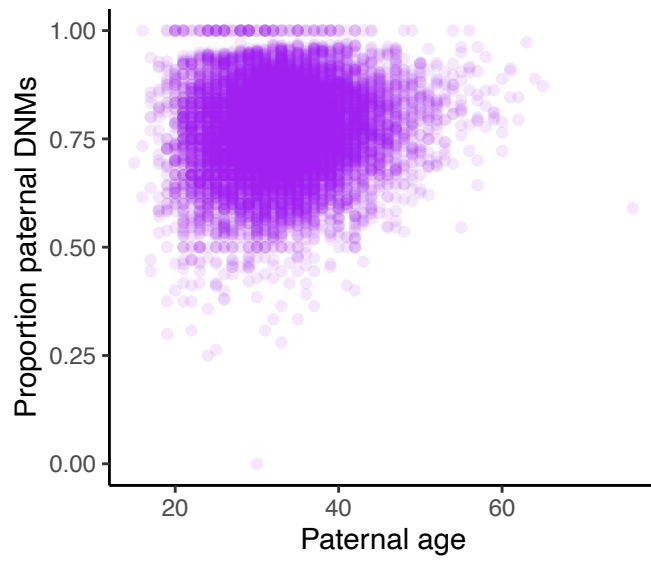

**Supplemental Figure 2:** Proportion of paternally phased DNMs against paternal age. X-axis refers to paternal age at child's birth. Y-axis is the proportion of phased DNMs that phased paternally.

(a)

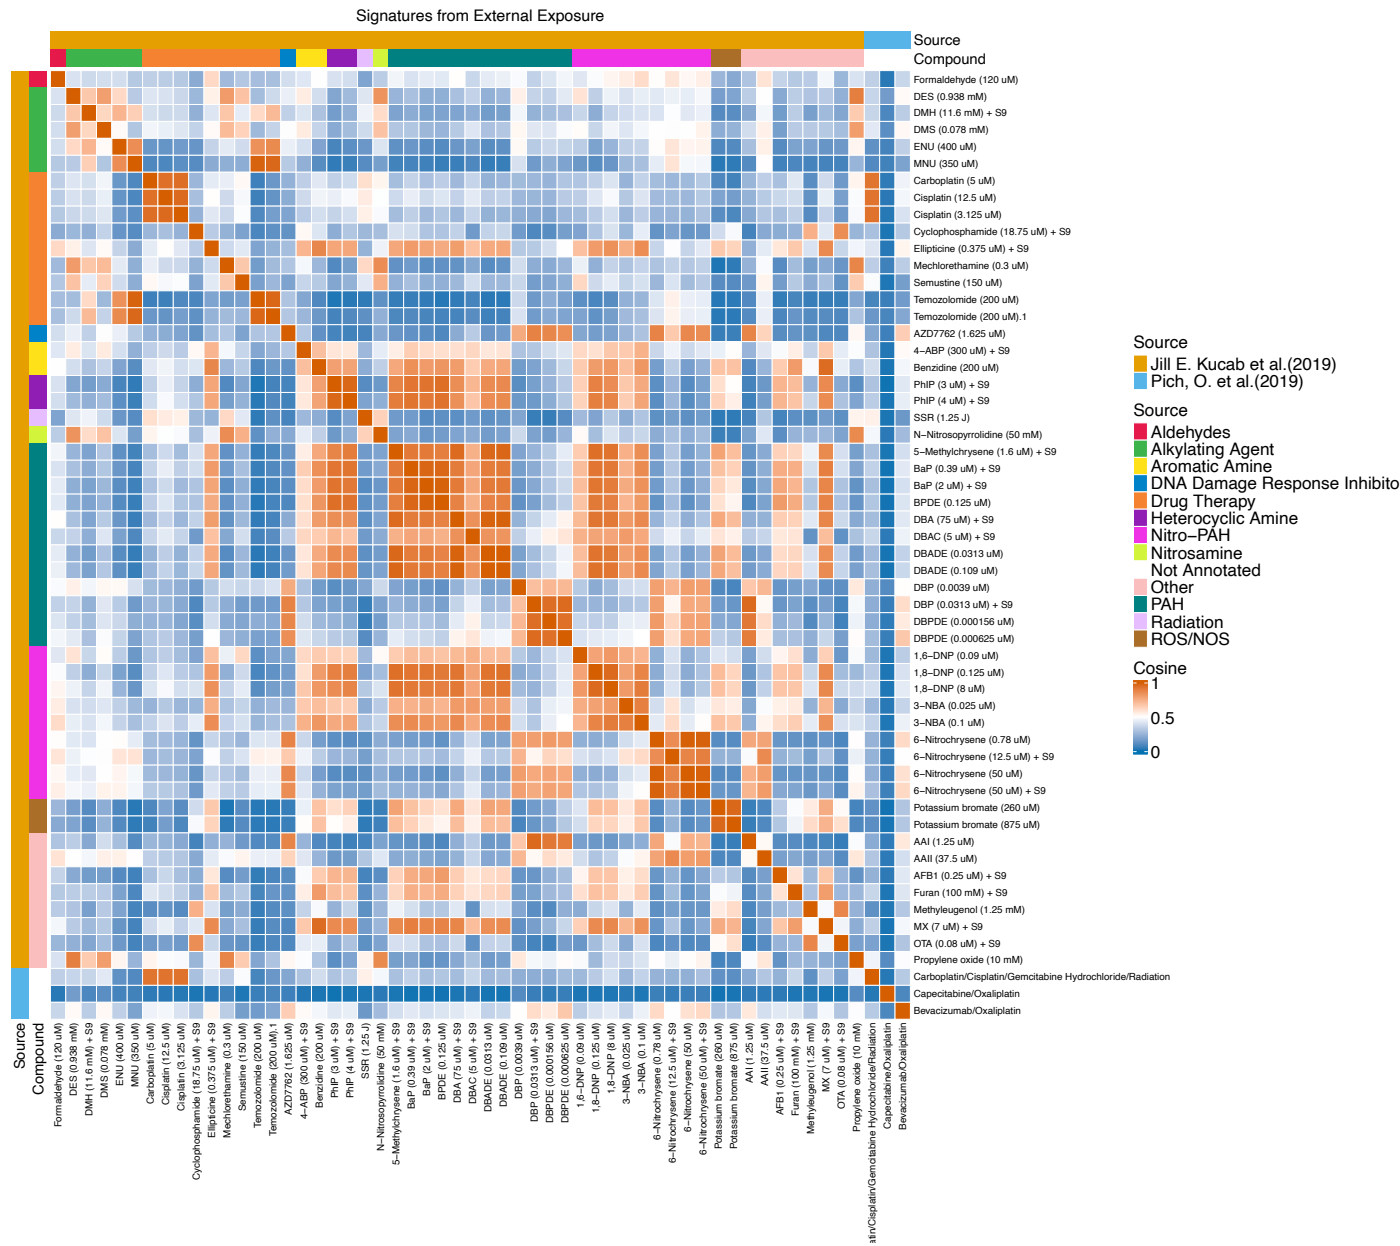

(b)

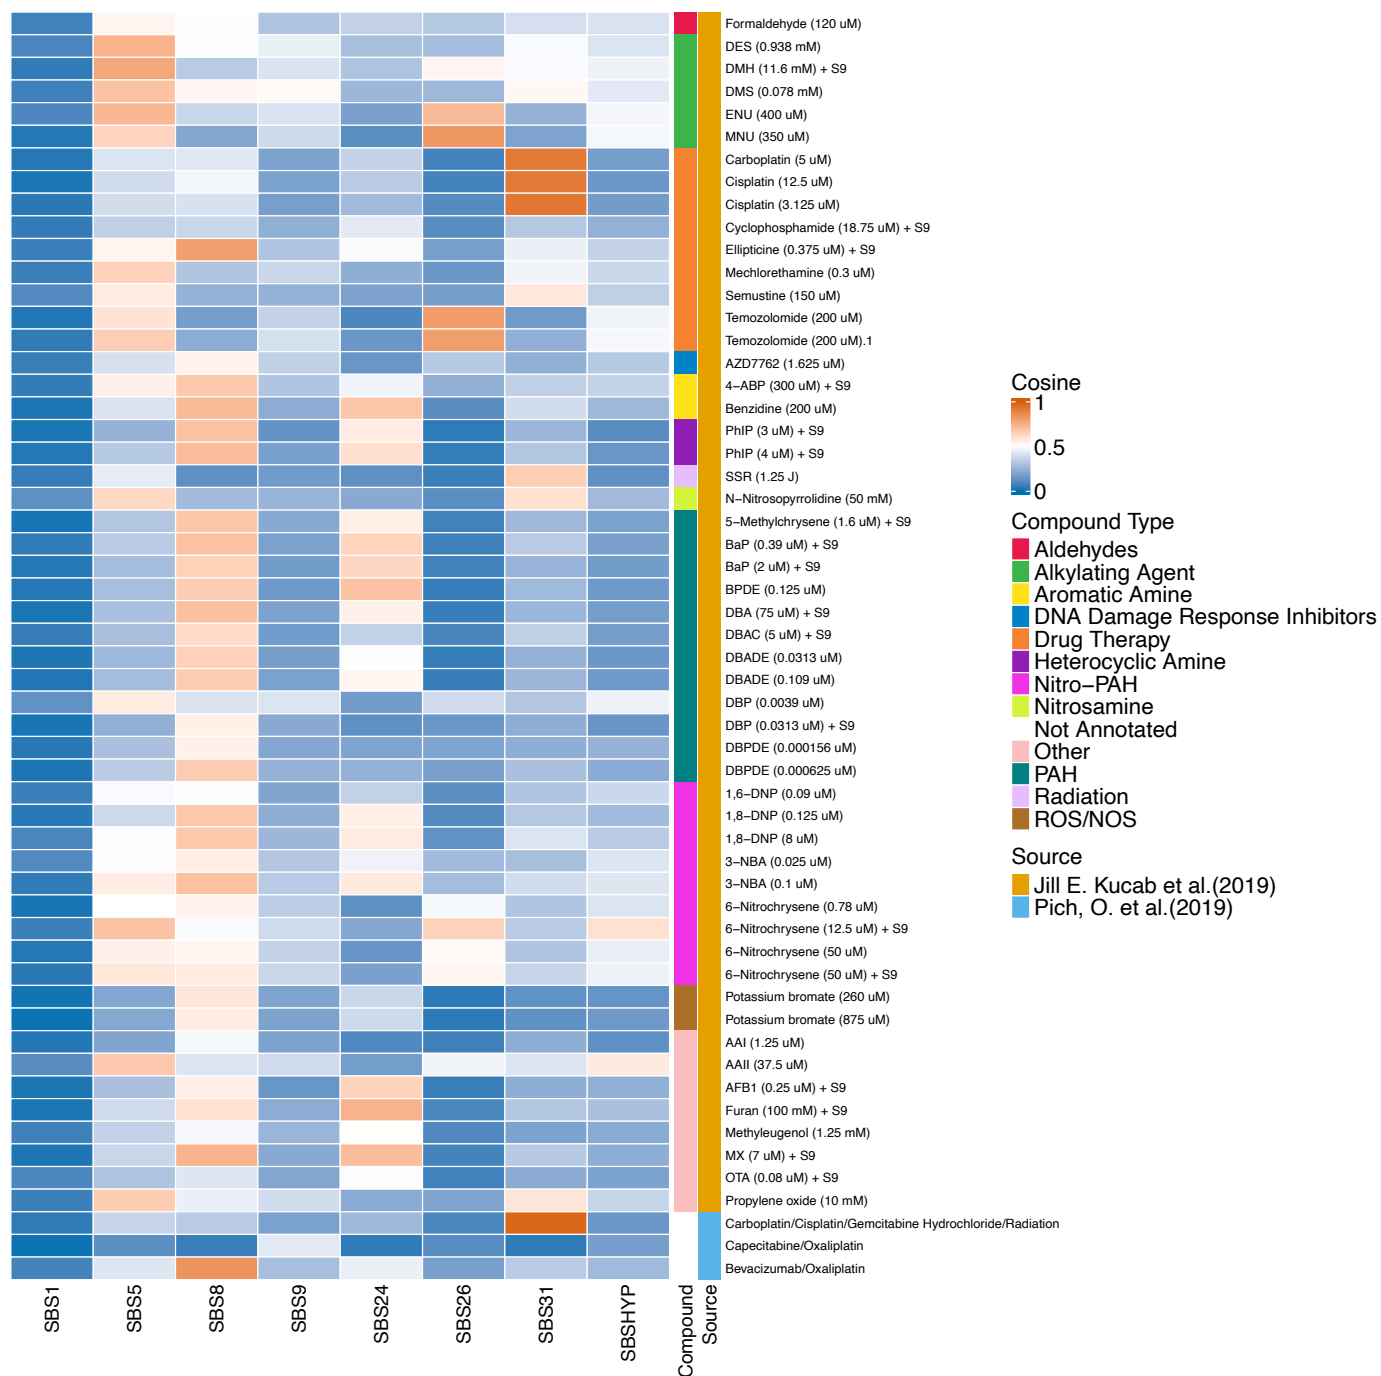

### Supplemental Figure 3:

- Cosine similarity of all the signatures caused by environmental mutagens amongst themselves.
- Cosine similarity of all the signatures caused by environmental mutagens with the extracted signatures from the hypermutated individuals. These signatures were compiled from Kucab et al 2019, Pich et al 2019 and Volkova et al 2020 (see Methods)

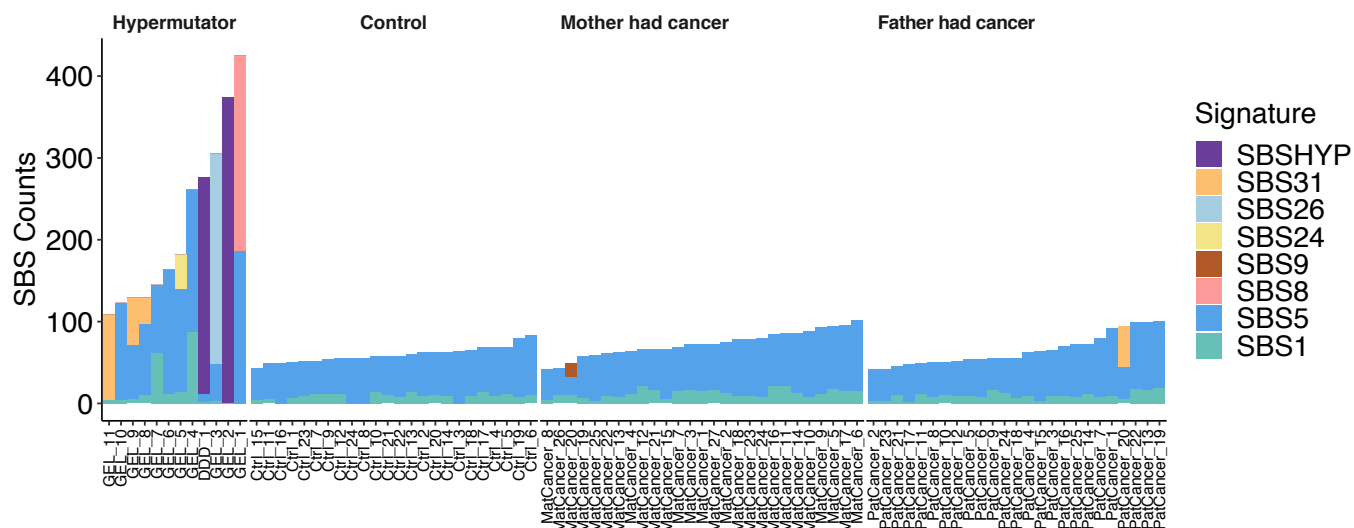

**Supplemental Figure 4:** Mutational signature contributions for hypermutators, a set of controls selected matched on parental age and individuals who have a parental history of cancer.

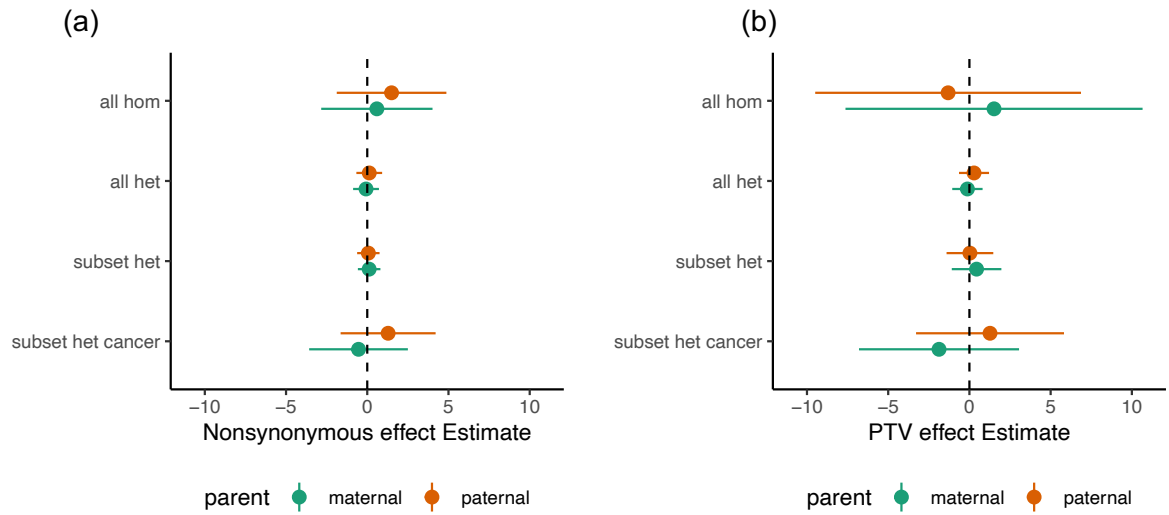

**Supplemental Figure 5:** Impact of rare variants in DNA repair genes on germline mutation rate. Poisson regression effect estimates for binary variables of having a parental variant in genes known to be involved in DNA repair. (a) considered all nonsynonymous variants in the subsets (b) is restricted to PTVs.



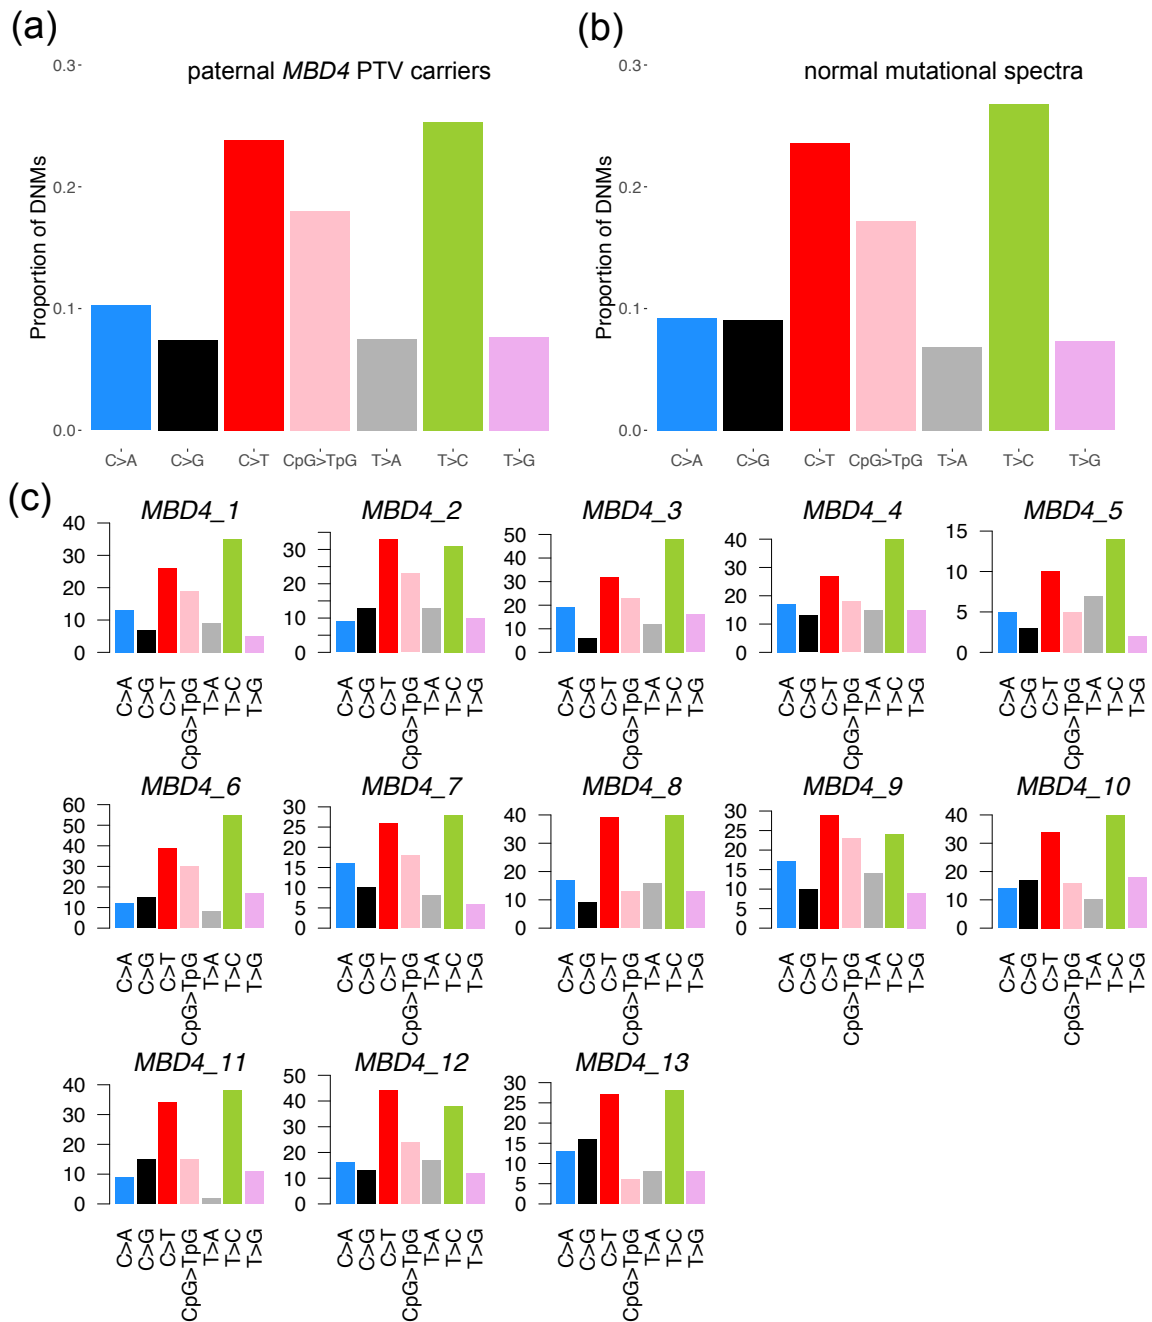

**Supplemental Figure 6:** Comparing the mutational spectra of DNMs across the 13 paternal *MBD4* paternal PTV carriers (a) with the expected proportion of mutations (b) in each mutation type taken from Rahbari et al. (c) The individual mutational spectra demonstrating that no one individual has an elevated number of CpG>TpG mutations.

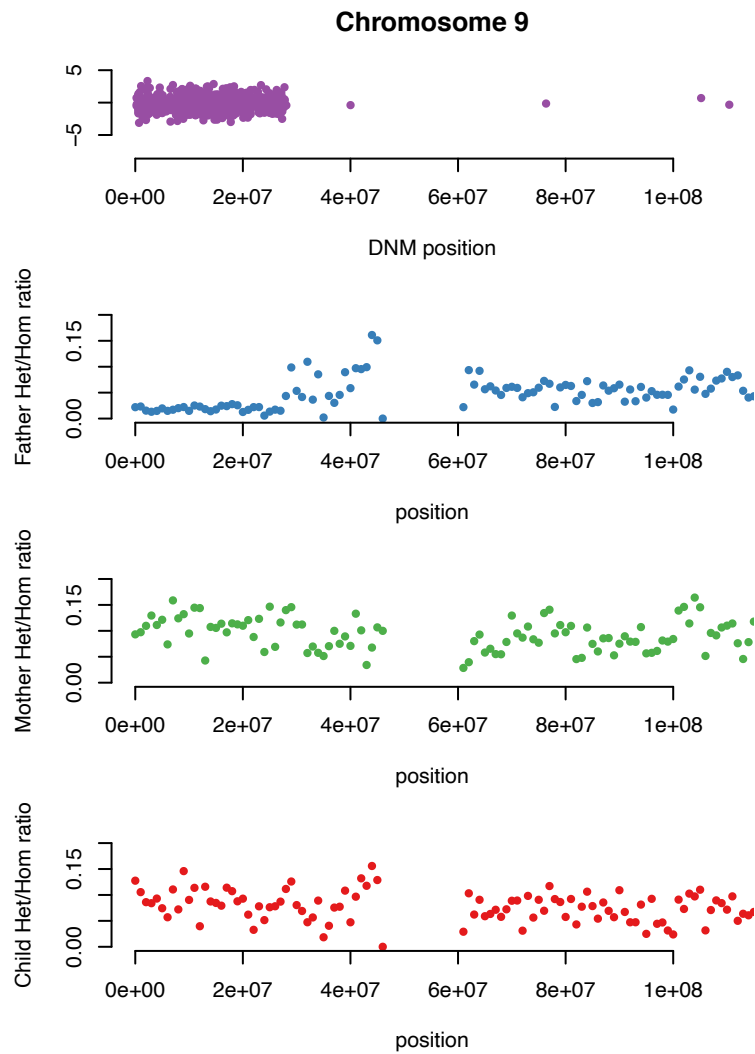

**Supplemental Figure 7:** Loss of transmitted allele example leading to false positive DNMs  
 Top plot shows the location of the called DNMs in the child on chromosome 9. The plots below show the heterozygous/homozygous ratio in the Father, Mother and Child showing a loss of heterozygosity in the father in the same region the DNMs have been called.

## **Supplemental Tables**

Supplemental Table 1: Trinucleotide mutation counts for 12 hypermutated individuals

Supplemental Table 3: Mutation probabilities for novel mutational signature SBSHYP

Supplemental Table 4: DNA repair genes with annotations taken from <https://www.mdanderson.org/documents/Labs/Wood-Laboratory/human-dna-repair-genes.html> (accessed January 2020)

| ID            | C>A      | C>G     | C>T     | CpG>TpG | T>A     | T>C      | T>G     |
|---------------|----------|---------|---------|---------|---------|----------|---------|
| <i>GEL_1</i>  | 1.0E-158 | 7.9E-28 | 1.1E-28 | 1.9E-01 | 2.3E-30 | 5.9E-17  | 1.5E-19 |
| <i>GEL_2</i>  | 4.2E-06  | 2.6E-68 | 3.7E-05 | 5.6E-02 | 5.9E-11 | 2.5E-64  | 4.9E-56 |
| <i>GEL_3</i>  | 6.8E-01  | 1.4E-01 | 1.5E-01 | 8.8E-01 | 6.1E-01 | 3.6E-216 | 3.3E-01 |
| <i>DDD_1</i>  | 2.2E-10  | 3.1E-51 | 2.1E-10 | 6.6E-01 | 9.1E-04 | 7.9E-16  | 1.8E-35 |
| <i>GEL_4</i>  | 4.2E-06  | 1.0E-04 | 6.7E-11 | 2.0E-47 | 1.0E-08 | 3.4E-14  | 5.1E-04 |
| <i>GEL_5</i>  | 4.6E-11  | 1.1E-08 | 2.1E-10 | 7.9E-02 | 5.1E-08 | 3.7E-05  | 1.6E-03 |
| <i>GEL_6</i>  | 4.5E-09  | 1.9E-07 | 3.7E-05 | 4.7E-01 | 1.6E-12 | 6.5E-03  | 1.1E-05 |
| <i>GEL_7</i>  | 6.8E-01  | 3.0E-01 | 3.7E-05 | 9.1E-31 | 4.5E-01 | 8.5E-02  | 1.0E+00 |
| <i>GEL_8</i>  | 3.1E-07  | 8.9E-02 | 3.7E-05 | 3.1E-01 | 2.0E-05 | 4.9E-02  | 1.2E-02 |
| <i>GEL_9</i>  | 1.9E-15  | 3.0E-01 | 7.7E-05 | 7.7E-01 | 8.1E-03 | 9.6E-03  | 8.3E-02 |
| <i>GEL_10</i> | 1.5E-04  | 1.9E-07 | 6.8E-02 | 5.6E-01 | 2.1E-02 | 7.1E-05  | 4.5E-02 |
| <i>GEL_11</i> | 9.3E-12  | 6.7E-01 | 6.4E-10 | 5.6E-01 | 1.3E-01 | 1.0E+00  | 2.6E-02 |

**Supplemental Table 2:** Corresponding p-values for enrichment of mutation type for each hypermutated individual. This is a two-sided Poisson test comparing the average number of mutations in each type across all individuals in the 100kGP cohort. These are demonstrated as colours in Figure 1b.

| ID    | Child disease                                      | Genetic variant**                                                                                                                                                                    | Parental chemotherapy exposure*                                             |
|-------|----------------------------------------------------|--------------------------------------------------------------------------------------------------------------------------------------------------------------------------------------|-----------------------------------------------------------------------------|
| GEL_1 | Epileptic encephalopathy                           | Father: 3:14165549 G>A homozygous<br>NM_004628.5(XPC):c.658C>T (p.Arg220Ter)<br>ClinVar ID: 550020<br>GnomAD allele frequency: 2.2e-5<br>Clinical diagnosis of xeroderma pigmentosum | NA                                                                          |
| GEL_2 | Multisystem developmental disorder                 | NA                                                                                                                                                                                   | Nephrotic syndrome: Cyclophosphamide, Chlorambucil (and immunosuppressants) |
| GEL_3 | Intellectual disability                            | Father: 16:83139 G>A homozygous<br>NM_002434.4(MPG):c.403G>A (p.Ala135Thr)<br>ClinVar ID: absent<br>GnomAD allele frequency: 9.57e-5                                                 | NA                                                                          |
| GEL_4 | Multisystem developmental disorder, myelodysplasia | Child: 12:11885935 A>G mosaic heterozygous<br>NM_001987.5(ETV6):c.1162A>G (p.Asn388Asp)<br>ClinVar ID: absent<br>GnomAD allele frequency: 0 (absent)                                 | NA                                                                          |
| GEL_5 | Pulmonary fibrosis                                 | NA                                                                                                                                                                                   | Systemic lupus erythematosus: [Chemotherapy confirmed, drugs unknown]       |
| GEL_6 | Congenital myopathy                                | NA                                                                                                                                                                                   | NA                                                                          |
| GEL_7 | Intellectual disability                            | NA                                                                                                                                                                                   | NA                                                                          |

|        |                                          |    |                                                                                                                            |
|--------|------------------------------------------|----|----------------------------------------------------------------------------------------------------------------------------|
| GEL_8  | Abnormality of copper homeostasis        | NA | Testicular cancer:<br>Drugs unknown                                                                                        |
| GEL_9  | Intellectual disability                  | NA | Testicular cancer:<br>BEP (Bleomycin, etoposide and platinum)                                                              |
| GEL_10 | Intellectual disability                  | NA | NA                                                                                                                         |
| GEL_11 | Cataracts                                | NA | Cancer of long bones, intestinal tract, lung (secondary):<br>Drugs unknown                                                 |
| DDD_1  | Global Developmental Delay, Microcephaly | NA | Hodgkins Lymphoma:<br>ABVD (Bleomycin-Dacarbazine-Doxorubicin-Vinblastine)<br>IVE (Iphosphamide, epirubicin and etoposide) |

\*prior to conception

\*\* GRCh38 coordinates

**Supplemental Table 5:** Summary of putative mutagenic variants and parental pharmacological exposures for hypermutated individuals

| MPG variant        | allele frequency <sup>1</sup> | eA•T<br>k <sub>rel</sub> | Hx•T<br>k <sub>rel</sub> | Specificity<br>eA/Hx | Reference                       |
|--------------------|-------------------------------|--------------------------|--------------------------|----------------------|---------------------------------|
| R120C <sup>3</sup> | 5×10 <sup>-4</sup>            | 0.9                      | NR <sup>2</sup>          | NR                   | Adhikari, Chetram et al. (2015) |
| Y127W              | NR                            | 0.13                     | NR                       | NR                   | O'Brien and Ellenberger (2003)  |
| R141Q <sup>3</sup> | 8×10 <sup>-5</sup>            | 0.8                      | NR                       | NR                   | Adhikari, Chetram et al. (2015) |
| Y159W              | NR                            | 0.37                     | NR                       | NR                   | O'Brien and Ellenberger (2003)  |
| <b>A135T</b>       | <b>1×10<sup>-4</sup></b>      | <b>2.2</b>               | <b>0.93</b>              | <b>2.4</b>           | <b>this work</b>                |
| R138S              | NR                            | 1.1                      | 0.78                     | 1.3                  | Zhang and O'Brien (2015)        |
| R141M              | NR                            | 1.0                      | 1.0                      | 1.0                  | Zhang and O'Brien (2015)        |
| R145S              | NR                            | 1.0                      | 0.32                     | 3.1                  | Zhang and O'Brien (2015)        |
| Y162W              | NR                            | 1.0                      | 0.42                     | 2.4                  | Hendershot and O'Brien (2017)   |
| N169S <sup>4</sup> | NR                            | 2.0                      | 1.1                      | 1.8                  | O'Brien and Ellenberger (2004)  |
| R182M              | NR                            | 0.64                     | 0.44                     | 1.5                  | Zhang and O'Brien (2015)        |
| R197S              | NR                            | 1.1                      | 0.68                     | 1.5                  | Zhang and O'Brien (2015)        |
| K210M              | NR                            | 0.9                      | 1.1                      | 0.82                 | Zhang and O'Brien (2015)        |
| K220M              | NR                            | 1.5                      | 0.85                     | 1.8                  | Zhang and O'Brien (2015)        |
| K229M              | NR                            | 1.0                      | 0.93                     | 1.1                  | Zhang and O'Brien (2015)        |

**Supplemental Table 6:** Compilation of single turnover excision kinetics for MPG variants: Relative single-turnover glycosylase activity is reported as the ratio of the single turnover rate constant for the variant divided by that of the WT enzyme from the indicated reference. <sup>1</sup>Allele frequency from GnomAD. <sup>2</sup>NR, not reported. <sup>3</sup>R120C and R141Q are the most deleterious variants tested out of 8 rare alleles of MPG. R141Q and to a lesser extent R120C showed a modest increase in mutation frequency in a plasmid repair assay performed in HEK293 cells (Adhikari, Chetram et al. (2015)). <sup>4</sup>N169S shows a mutator phenotype when it is expressed in yeast (Eyler, Burnham et al. (2017), Connor, Wilson et al. (2005)).

| ID           | Number SNVs | Number Indels | SNV p-value | Paternal age | Maternal age | Paternal DNMs | Maternal DNMs | Phase p-value | Chemo code |
|--------------|-------------|---------------|-------------|--------------|--------------|---------------|---------------|---------------|------------|
| MatCancer_1  | 86          | 5             | 0.014       | (30,35]      | (25,30]      | 14            | 8             | 0.095         | Y          |
| MatCancer_10 | 49          | 4             | 0.983       | (35,40]      | (30,35]      | 12            | 6             | 0.194         | N          |
| MatCancer_11 | 67          | 8             | 0.440       | (30,35]      | (30,35]      | 15            | 5             | 0.469         | N          |
| MatCancer_12 | 61          | 6             | 0.433       | (25,30]      | (30,35]      | 22            | 3             | 0.940         | N          |
| MatCancer_13 | 79          | 10            | 0.249       | (35,40]      | (30,35]      | 20            | 6             | 0.536         | N          |
| MatCancer_14 | 79          | 6             | 0.298       | (35,40]      | (35,40]      | 15            | 4             | 0.639         | N          |
| MatCancer_15 | 60          | 5             | 0.710       | (30,35]      | (30,35]      | 17            | 5             | 0.562         | N          |
| MatCancer_16 | 43          | 6             | 0.609       | (20,25]      | (20,25]      | 11            | 5             | 0.274         | N          |
| MatCancer_17 | 73          | 4             | 0.336       | (35,40]      | (30,35]      | 19            | 1             | 0.993         | N          |
| MatCancer_18 | 72          | 8             | 0.369       | (35,40]      | (30,35]      | 15            | 7             | 0.201         | N          |
| MatCancer_19 | 75          | 11            | 0.318       | (35,40]      | (35,40]      | 15            | 7             | 0.201         | Y          |
| MatCancer_2  | 66          | 4             | 0.464       | (30,35]      | (30,35]      | 24            | 3             | 0.958         | N          |
| MatCancer_20 | 72          | 10            | 0.324       | (30,35]      | (30,35]      | 18            | 5             | 0.605         | N          |
| MatCancer_21 | 64          | 6             | 0.779       | (35,40]      | (30,35]      | 16            | 2             | 0.934         | N          |
| MatCancer_22 | 94          | 6             | 0.155       | (40,45]      | (40,45]      | 20            | 6             | 0.536         | Y          |
| MatCancer_23 | 103         | 4             | 0.101       | (45,50]      | (35,40]      | 22            | 14            | 0.018         | Y          |
| MatCancer_24 | 68          | 6             | 0.553       | (35,40]      | (25,30]      | 17            | 4             | 0.720         | N          |
| MatCancer_25 | 43          | 3             | 0.745       | (20,25]      | (20,25]      | 11            | 3             | 0.633         | Y          |
| MatCancer_26 | 93          | 5             | 0.279       | (45,50]      | (30,35]      | 22            | 5             | 0.750         | Y          |
| MatCancer_27 | 88          | 5             | 0.176       | (40,45]      | (30,35]      | 17            | 6             | 0.407         | N          |
| MatCancer_3  | 62          | 3             | 0.892       | (35,40]      | (40,45]      | 16            | 3             | 0.829         | Y          |
| MatCancer_4  | 86          | 6             | 0.529       | (45,50]      | (35,40]      | 33            | 8             | 0.721         | N          |
| MatCancer_5  | 67          | 5             | 0.565       | (35,40]      | (25,30]      | 20            | 8             | 0.273         | N          |
| MatCancer_6  | 85          | 4             | 0.014       | (25,30]      | (30,35]      | 21            | 6             | 0.577         | N          |
| MatCancer_7  | 96          | 1             | 0.122       | (40,45]      | (40,45]      | 19            | 10            | 0.091         | N          |
| MatCancer_8  | 78          | 3             | 0.092       | (30,35]      | (20,25]      | 20            | 2             | 0.971         | N          |
| MatCancer_9  | 58          | 3             | 0.321       | (25,30]      | (20,25]      | 11            | 4             | 0.437         | Y          |
| PatCancer_1  | 49          | 5             | 0.966       | (30,35]      | (30,35]      | 12            | 5             | 0.842         | N          |
| PatCancer_10 | 94          | 8             | 0.005       | (30,35]      | (25,30]      | 24            | 3             | 0.118         | N          |
| PatCancer_11 | 45          | 10            | 0.713       | (20,25]      | (20,25]      | 11            | 3             | 0.619         | N          |
| PatCancer_12 | 99          | 10            | 0.143       | (45,50]      | (25,30]      | 21            | 7             | 0.727         | N          |
| PatCancer_13 | 42          | 6             | 0.955       | (25,30]      | (25,30]      | 9             | 6             | 0.968         | N          |
| PatCancer_14 | 55          | 7             | 0.800       | (30,35]      | (30,35]      | 15            | 3             | 0.407         | Y          |
| PatCancer_15 | 73          | 10            | 0.147       | (30,35]      | (20,25]      | 18            | 6             | 0.725         | N          |
| PatCancer_16 | 92          | 4             | 0.475       | (55,60]      | (25,30]      | 27            | 0             | 0.001         | N          |
| PatCancer_17 | 42          | 3             | 0.667       | (20,25]      | (15,20]      | 9             | 4             | 0.858         | N          |
| PatCancer_18 | 65          | 3             | 0.806       | (40,45]      | (30,35]      | 14            | 8             | 0.961         | N          |
| PatCancer_19 | 63          | 6             | 0.746       | (35,40]      | (30,35]      | 14            | 3             | 0.456         | N          |
| PatCancer_2  | 52          | 1             | 0.381       | (20,25]      | (15,20]      | 12            | 3             | 0.563         | Y          |
| PatCancer_20 | 54          | 4             | 0.333       | (20,25]      | (25,30]      | 14            | 7             | 0.925         | N          |
| PatCancer_21 | 54          | 4             | 0.828       | (30,35]      | (30,35]      | 12            | 2             | 0.367         | N          |
| PatCancer_22 | 80          | 8             | 0.287       | (35,40]      | (30,35]      | 16            | 8             | 0.934         | Y          |
| PatCancer_23 | 50          | 4             | 0.851       | (25,30]      | (30,35]      | 12            | 9             | 0.991         | N          |
| PatCancer_24 | 55          | 3             | 0.889       | (35,40]      | (30,35]      | 11            | 7             | 0.970         | Y          |
| PatCancer_25 | 51          | 4             | 0.952       | (35,40]      | (30,35]      | 7             | 5             | 0.968         | N          |
| PatCancer_3  | 99          | 6             | 0.129       | (50,55]      | (20,25]      | 26            | 6             | 0.411         | N          |
| PatCancer_4  | 73          | 5             | 0.025       | (25,30]      | (20,25]      | 20            | 6             | 0.646         | N          |
| PatCancer_5  | 64          | 4             | 0.195       | (25,30]      | (25,30]      | 9             | 3             | 0.732         | N          |
| PatCancer_6  | 70          | 5             | 0.721       | (40,45]      | (35,40]      | 7             | 5             | 0.968         | N          |
| PatCancer_7  | 48          | 5             | 0.426       | (20,25]      | (15,20]      | 17            | 4             | 0.484         | N          |
| PatCancer_8  | 55          | 5             | 0.624       | (25,30]      | (30,35]      | 10            | 6             | 0.954         | N          |
| PatCancer_9  | 100         | 5             | 0.001       | (30,35]      | (30,35]      | 29            | 8             | 0.556         | N          |

**Supplemental Table 7:** Individuals with a parent with a cancer diagnosis reported in hospital episode statistics prior to conception. Prefix of ID indicates whether the mother (MatCancer) or father (PatCancer) is the parent with cancer diagnosis. Number of SNVs and Indels refers to the DNMs count in the child. The SNV p-value is test for if the number of SNVs is significantly greater than expected given parental age. Paternal and maternal age are given in 5 year bins. The number of paternal and maternal DNMs are the count of DNMs that phased paternally and maternally. The phase p-value is testing if proportion of DNMs that phase paternally is different to overall proportion across 100kGP dataset. Chemo code indicates whether the parent also has an ICD10 code for chemotherapy yes (Y) or no (N).



| Variant Subset    | Csq    | Genotype | Paternal count | Paternal Effect | Paternal p-value | Maternal count | Maternal effect | Maternal p-value |
|-------------------|--------|----------|----------------|-----------------|------------------|----------------|-----------------|------------------|
| All DNA repair    | nonsyn | het      | 5857           | 0.12            | 0.65             | 5903           | -0.08           | 0.79             |
|                   | PTV    | het      | 1203           | 0.28            | 0.36             | 1150           | -0.12           | 0.70             |
|                   | nonsyn | hom      | 78             | 1.50            | 0.19             | 71             | 0.59            | 0.61             |
|                   | PTV    | hom      | 13             | -1.31           | 0.64             | 11             | 1.52            | 0.62             |
| Subset DNA repair | nonsyn | het      | 3075           | 0.07            | 0.77             | 2918           | 0.12            | 0.62             |
|                   | PTV    | het      | 432            | 0.03            | 0.95             | 388            | 0.44            | 0.39             |
| Germline cancer   | nonsyn | het      | 103            | 1.28            | 0.19             | 97             | -0.54           | 0.60             |
|                   | PTV    | het      | 41             | 1.27            | 0.41             | 35             | -1.87           | 0.26             |

**Supplemental Table 8:** Impact of parental rare variants in DNA repair genes on germline mutation rate. Effect estimates and corresponding p-values from 8 regression models on three subsets of variant groups. Csq: consequence of variants examined where 'nonsyn' refers to nonsynonymous variants and PTV refers to a subset of these of just protein truncating variants. Genotype details whether the variants considered were 'het': heterozygous or 'hom': homozygous. Paternal count refers to the number of variants found in this subset in paternal genomes and maternal count refers to the equivalent for mothers.

| MAF bin               | LD group | Maternal h <sup>2</sup> | Maternal SE | Paternal h <sup>2</sup> | Paternal SE |
|-----------------------|----------|-------------------------|-------------|-------------------------|-------------|
| 0.001-0.01            | low      | 0.151                   | 0.195       | 0.337                   | 0.167       |
|                       | High     | -0.008                  | 0.205       | 0.181                   | 0.136       |
| 0.01-0.05             | low      | -0.018                  | 0.083       | 10 <sup>-6</sup>        | 0.070       |
|                       | high     | 0.026                   | 0.032       | 10 <sup>-6</sup>        | 0.026       |
| 0.05-1                | low      | -0.074                  | 0.061       | 10 <sup>-6</sup>        | 0.051       |
|                       | high     | -0.002                  | 0.032       | 0.008                   | 0.027       |
| TOTAL                 | -        | 0.071<br>p = 0.21       | 0.255       | 0.526<br>p = 0.095      | 0.165       |
| Number of individuals | -        | 6329                    |             | 6352                    |             |

**Supplemental Table 9:** Maternal and paternal SNP heritability of residuals of number of dnSNVs after correcting for parental age, hypermutation status and data quality. Results from GREML-LDMS binned on three minor allele frequency (MAF) bins and two LD groups. High LD refers to variants with LD > median LD and low LD refers to variants with LD < medianLD. Maternal heritability has negative estimates as this was run without being constrained to positive numbers due to estimates not converging otherwise. SE refers to standard error of the h<sup>2</sup> estimate. Performed on a subset of individuals with white british ancestry.

## Supplementary References

- Adhikari, S., M. A. Chetram, J. Woodrick, P. S. Mitra, P. V. Manthena, P. Khatkar, S. Dakshanamurthy, M. Dixon, S. K. Karmahapatra, N. K. Nuthalapati, S. Gupta, G. Narasimhan, R. Mazumder, C. A. Loffredo, A. Uren and R. Roy (2015). "Germ line variants of human N-methylpurine DNA glycosylase show impaired DNA repair activity and facilitate 1,N6-ethenoadenine-induced mutations." *J Biol Chem* **290**(8): 4966-4980.
- Connor, E. E., J. J. Wilson and M. D. Wyatt (2005). "Effects of substrate specificity on initiating the base excision repair of N-methylpurines by variant human 3-methyladenine DNA glycosylases." *Chem Res Toxicol* **18**(1): 87-94.
- Eyler, D. E., K. A. Burnham, T. E. Wilson and P. J. O'Brien (2017). "Mechanisms of glycosylase induced genomic instability." *PLoS One* **12**(3): e0174041.
- Hendershot, J. M. and P. J. O'Brien (2017). "Search for DNA damage by human alkyladenine DNA glycosylase involves early intercalation by an aromatic residue." *J Biol Chem* **292**(39): 16070-16080.
- O'Brien, P. J. and T. Ellenberger (2003). "Human alkyladenine DNA glycosylase uses acid-base catalysis for selective excision of damaged purines." *Biochemistry* **42**(42): 12418-12429.
- O'Brien, P. J. and T. Ellenberger (2004). "Dissecting the broad substrate specificity of human 3-methyladenine-DNA glycosylase." *J Biol Chem* **279**(11): 9750-9757.
- Zhang, Y. and P. J. O'Brien (2015). "Repair of Alkylation Damage in Eukaryotic Chromatin Depends on Searching Ability of Alkyladenine DNA Glycosylase." *ACS Chem Biol* **10**(11): 2606-2615.
